# Supplementary material for: Gold Nanostars Embedded in PDMS Films: A Photothermal Material for Antibacterial Applications
Source: MDPI journal article supplement (doi:10.3390/nano11123252), 2021-11-30
Supplement: s1 [file s1]

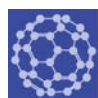

Supplementary Material

# Gold Nanostars Embedded in PDMS Films: A Photothermal Material for Antibacterial Applications

Gemma Toci <sup>1</sup>, Francesca Olgiati <sup>1</sup>, Piersandro Pallavicini <sup>1</sup>, Yuri Antonio Diaz Fernandez <sup>1</sup>, Lorenzo De Vita <sup>1</sup>, Giacomo Dacarro <sup>1</sup>, Pietro Grisoli <sup>2</sup> and Angelo Taglietti <sup>1,\*</sup>

<sup>1</sup> Department of Chemistry, University of Pavia, Viale Taramelli 12, 27100 Pavia, Italy; gemma.toci01@universitadipavia.it (G.T.); francesca.olgiati01@universitadipavia.it (F.O.); psp@unipv.it (P.P.); yudhiistira@gmail.com (Y.A.D.F.); lorenzo.devita01@universitadipavia.it (L.D.V.); giacomo.dacarro@unipv.it (G.D.)

<sup>2</sup> Department of Drug Sciences, University of Pavia, Viale Taramelli 14, 27100 Pavia, Italy; pietro.grisoli@unipv.it

\* Correspondence: angelo.taglietti@unipv.it; Tel.: +39-382-987-342

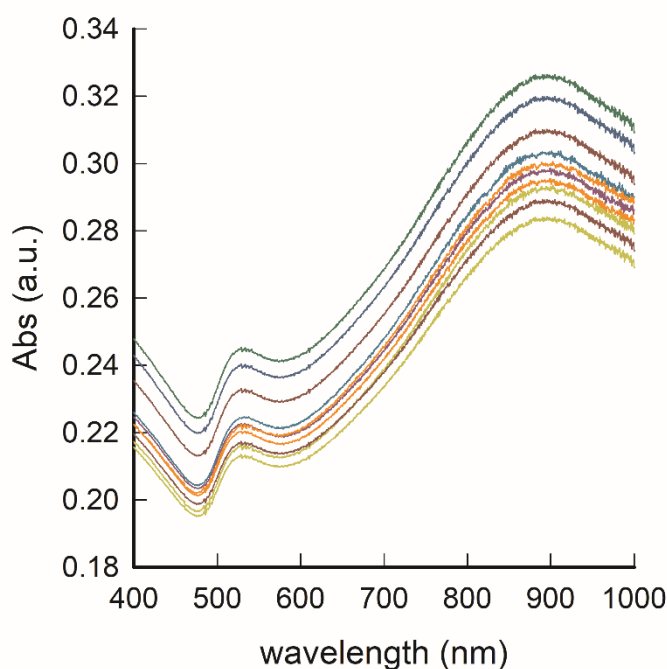

**Figure S1.** UV-Vis-NIR spectra taken in 10 different points of a PDMS sample (sample “b”, see Figure S3) with embedded GNS (concentration:  $2.7 \times 10^{-6}$  mol of Au for g of elastomer).

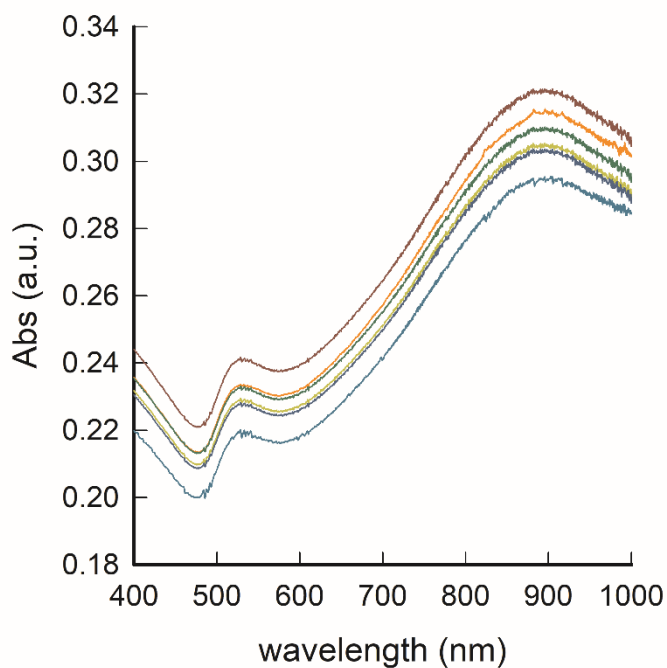

**Figure S2.** UV-Vis-NIR spectra of six PDMS samples (samples a-f, see Figure S3) with embedded GNS (concentration:  $2.7 \times 10^{-6}$  mol of Au for g of elastomer). Each spectrum is obtained as a mean spectrum from measurements in ten different points of each sample.

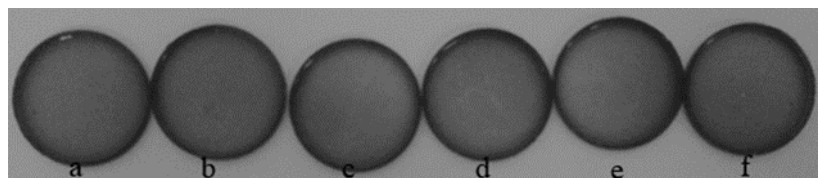

**Figure S3.** Photograph of six different samples of PDMS with embedded GNS having concentration of  $2.7 \times 10^{-6}$  mol of Au for g of elastomer.

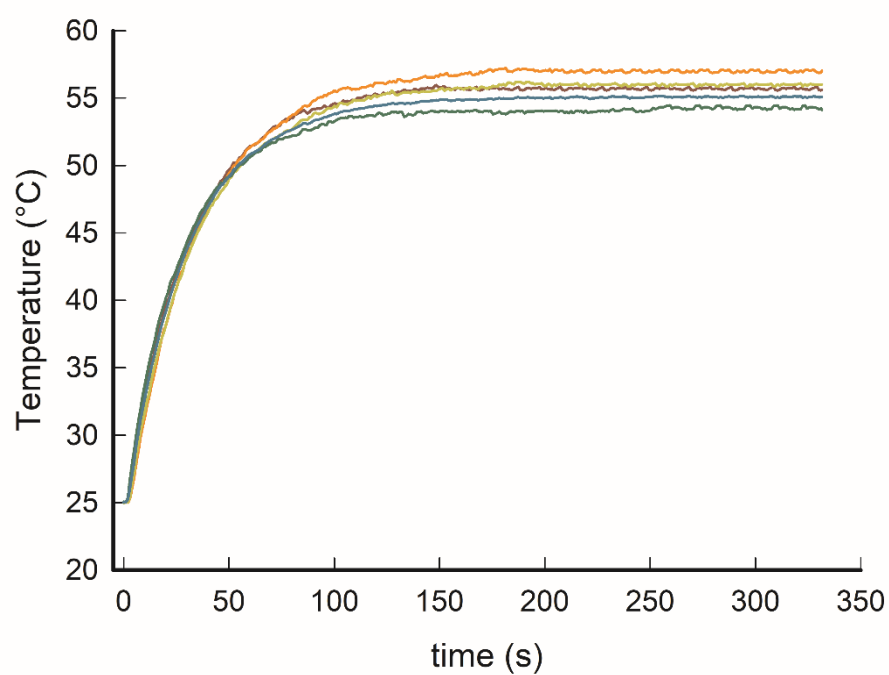

**Figure S4.** Thermograms obtained in five different spots of a PDMS sample (sample “a” in Figure S3) upon irradiation at 808 nm with irradiance 0.264 W/cm<sup>2</sup>.
